# Supplementary material
Source: publisher figshare collection journal article supplement (https://acs.figshare.com/ndownloader/files/4595212)
Supplement: Supplementary file 1 [file 4595212]

# Controlling Film Morphology in Conjugated Polymer:Fullerene Blends with Surface Patterning

Lee Y. Park,<sup>\*, ‡</sup> Andrea M. Munro<sup>§</sup> David S. Ginger<sup>\*, §</sup>

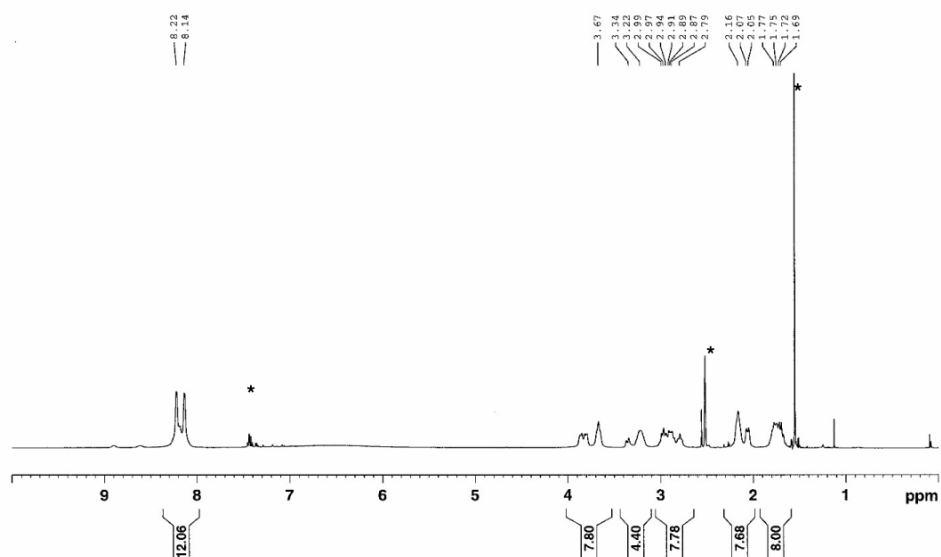

**Figure S1**  $^1\text{H}$  NMR ( $\text{d}_6\text{-DMSO}$ , 500 MHz) of **2** (collected on a Bruker 500 MHz Avance Spectrometer.) Residual solvent signals are marked with an asterisk.

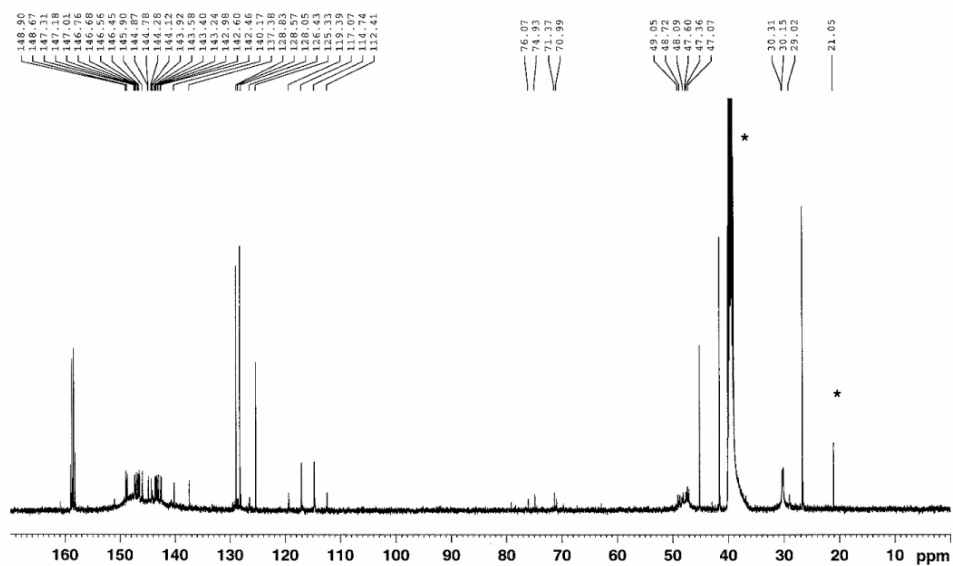

**Figure S2**  $^{13}\text{C}$  NMR ( $\text{d}_6\text{-DMSO}$ , 500 MHz) of **2** (collected on a Bruker 500 MHz Avance Spectrometer.) Residual solvent signals are marked with an asterisk.

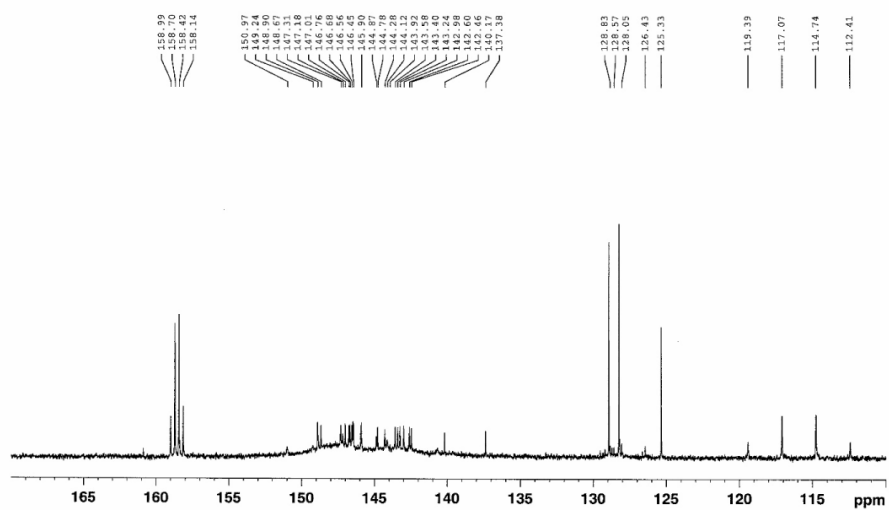

**Figure S3**  $^{13}\text{C}$  NMR ( $\text{d}_6\text{-DMSO}$ , 500 MHz) of **2**, expanded.

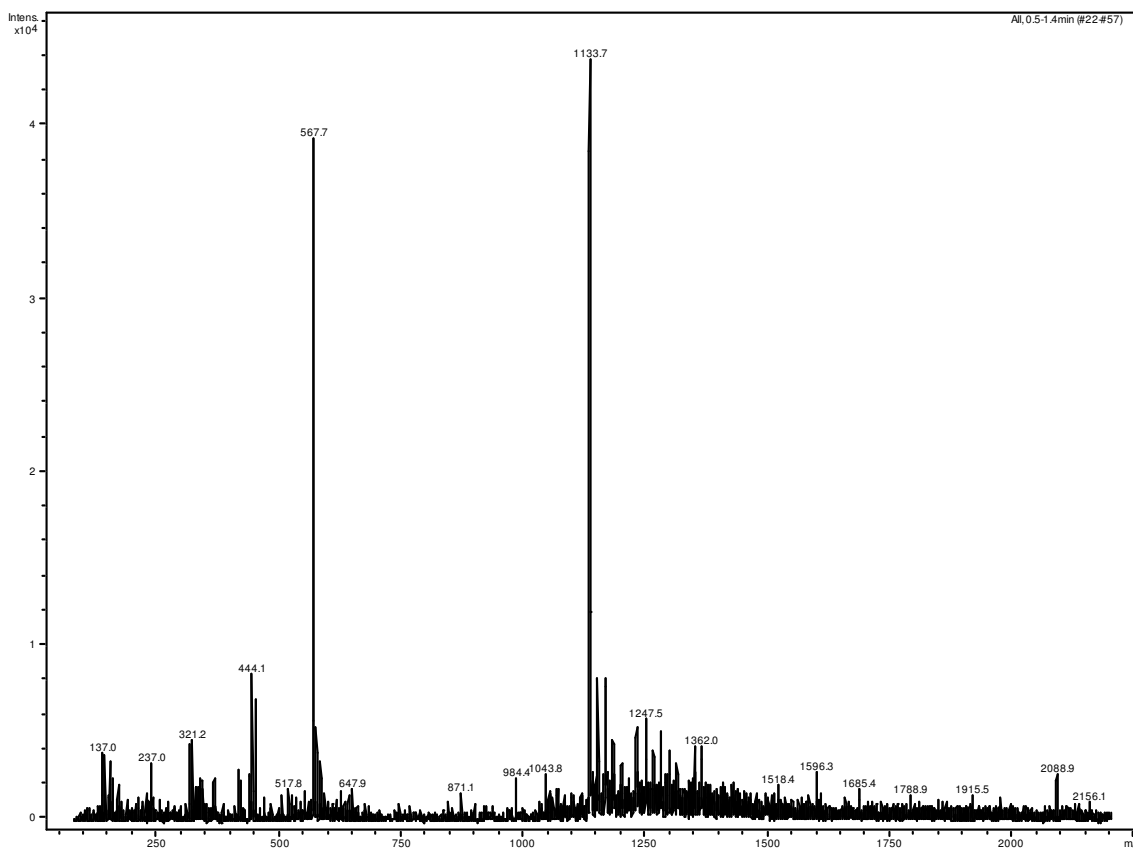

**Figure S4** ESI-MS of **2** obtained by direct infusion of the sample (from a solution in a mixture of DMSO and acetonitrile) on a Bruker Esquire LC ion trap mass spectrometer.



LYP1251A, 25 keV Bi<sub>3</sub><sup>+</sup>, Burst mode, Positive mode

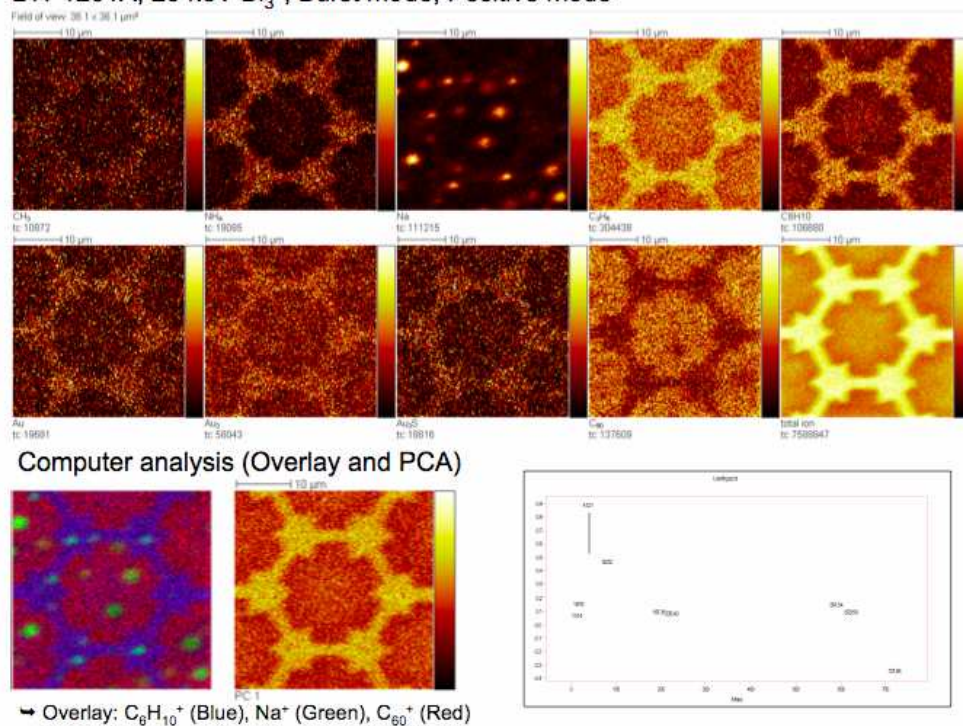

**Figure S6** ToF-SIMS maps for Au surface patterned with fullerene as illustrated in Figure 2, backfilled with HSpyr

LYP1251A, 25 keV Bi<sub>3</sub><sup>+</sup>, Burst mode, Negative mode

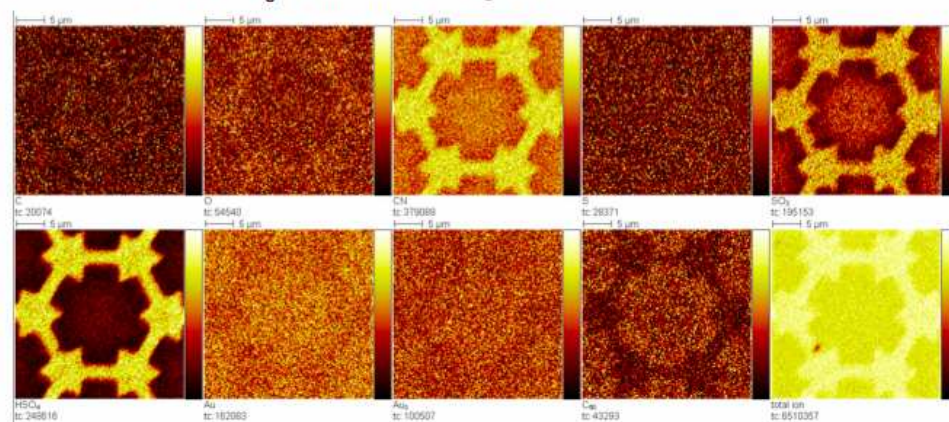

Computer analysis (Overlay and PCA)

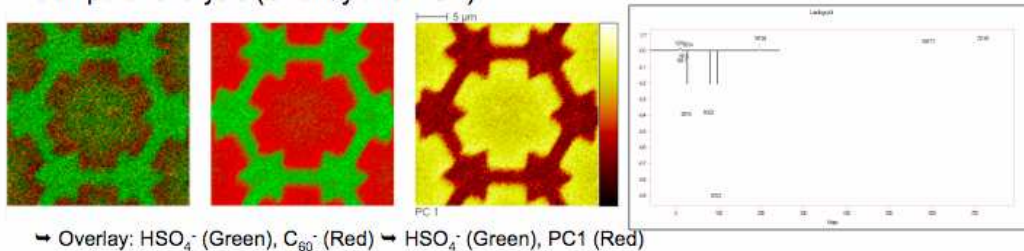

**Figure S7** ToF-SIMS maps for Au surface patterned with fullerene as illustrated in Figure 2, backfilled with HSpyr



# MDMO-PPV:PCBM

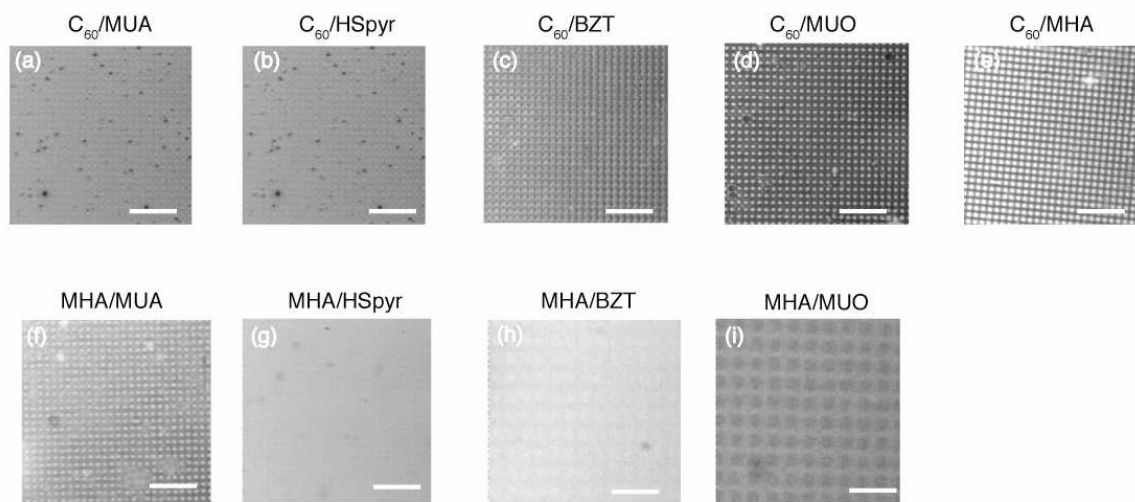

# P3HT:PCBM

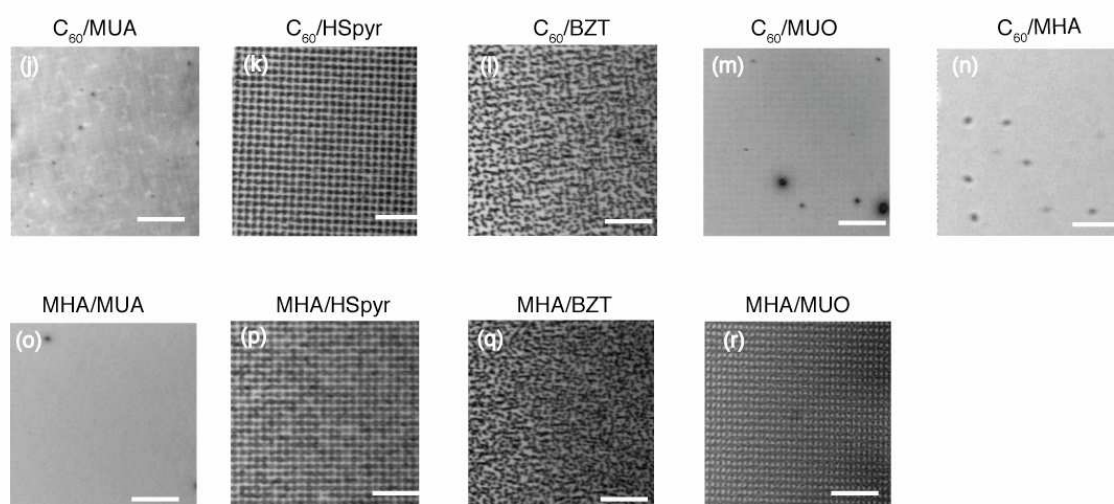

**Figure S8** Optical Microscopy Images of MDMO-PPV:PCBM and P3HT:PCBM films, cast onto patterned surfaces, after annealing. Scale bars in (a)-(g), (j)-(r) ~30  $\mu\text{m}$ ; in (h), (i) ~10  $\mu\text{m}$



# F8BT:PCBM

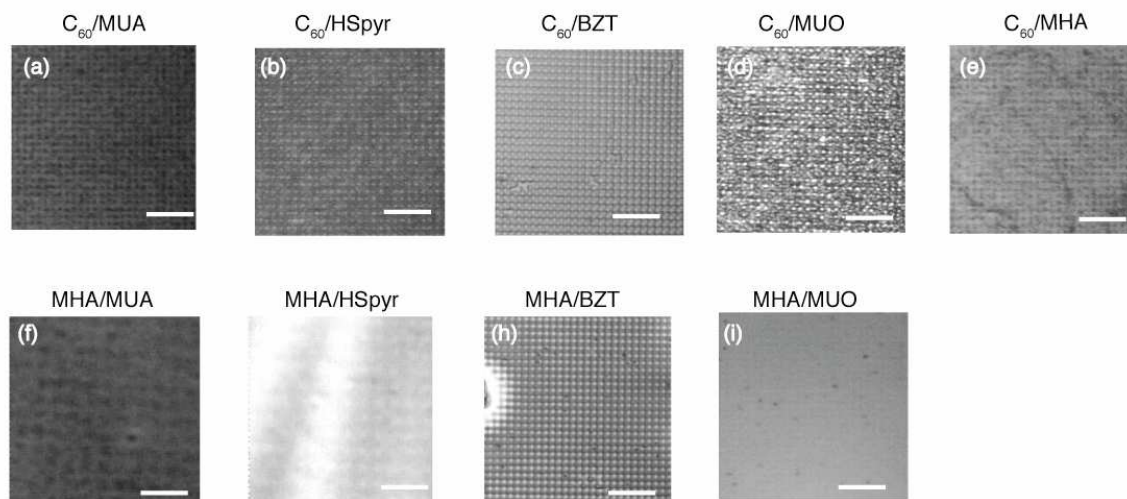

# PFB:PCBM

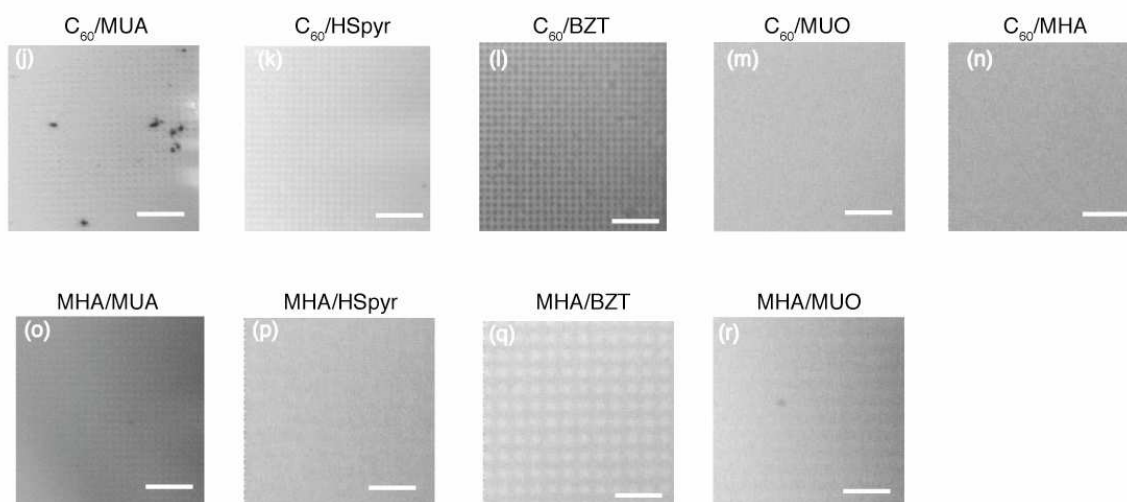

**Figure S9** Optical Microscopy Images of F8BT:PCBM and PFB:PCBM films cast onto patterned surfaces, after annealing. Scale bars in (a)-(e), (h)-(p)  $\sim 30\ \mu\text{m}$ ; in (f), (g), (q), (r)  $\sim 10\ \mu\text{m}$

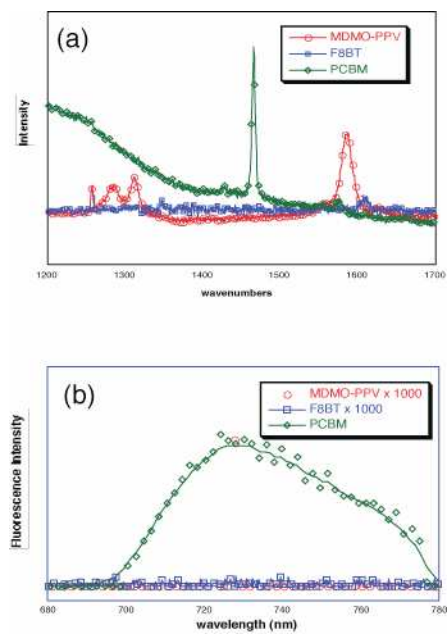

**Figure S10** (a) Raman spectra of MDMO-PPV, F8BT, and PCBM (b) Fluorescence spectra of MDMO-PPV, F8BT, and PCBM (excitation  $\lambda = 632$  nm)

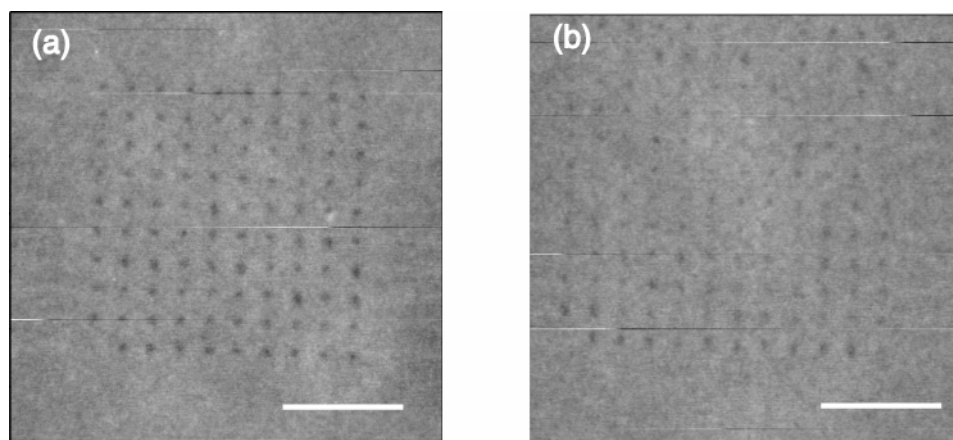

**Figure S11** AFM topography images (AC mode) of 200 nm thick MDMO-PPV:PCBM films on DPN-patterned surfaces (MHA/HSpyr) (a) DPN features ~200 nm in diameter (b) DPN features ~130 nm in diameter. Scale bars are 5  $\mu\text{m}$ .

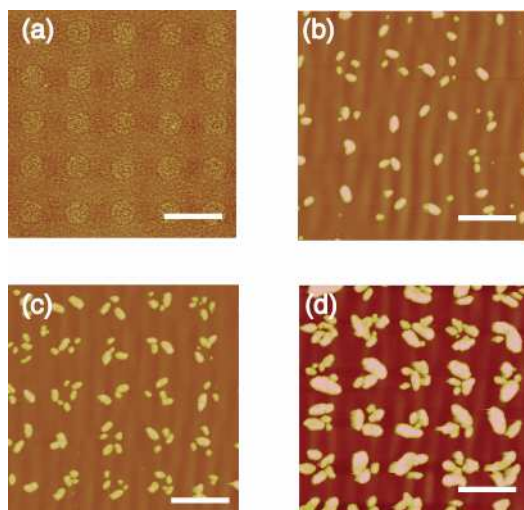

**Figure S12** AFM topography images (AC mode) for annealed films (130 °C, 30 min) of varying P3HT:PCBM composition (w:w ratios) cast onto MHA/HSpyr patterned substrates: (a) P3HT alone; (b) 2:1; (c) 1:2; (d) 1:2 . Scale bars are 5 microns; vertical scale (z) in (a) is 15 nm; (b)-(d) 200 nm.

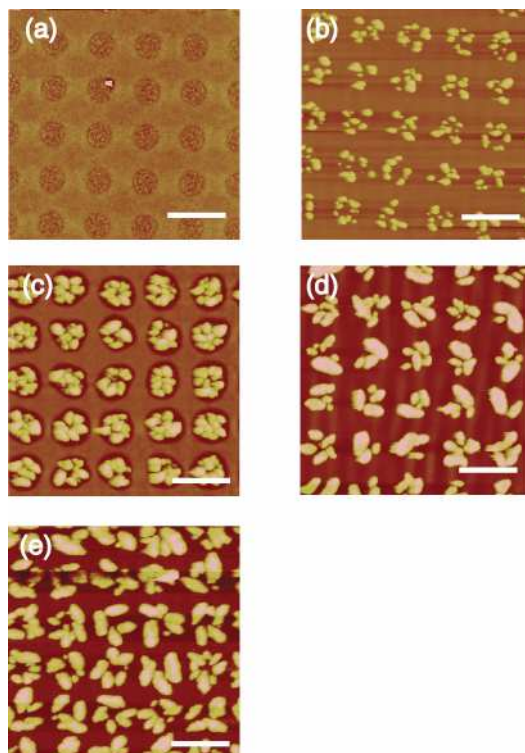

**Figure S13** AFM topography images (AC mode) showing the evolution of morphology of P3HT:PCBM film on MHA/HSpyr surface with variation in annealing conditions (a) 115 °C, 30 min (b) 120 °C, 40 min, (c) 130 °C, 30 min, (d) 125 °C, 30 min followed by 130 °C, 30 min, (e) 130 °C, 90 min. Scale bars are 5 microns in all cases. Vertical (z) scale for (a) 25 nm, for (b)-(d) 200 nm.

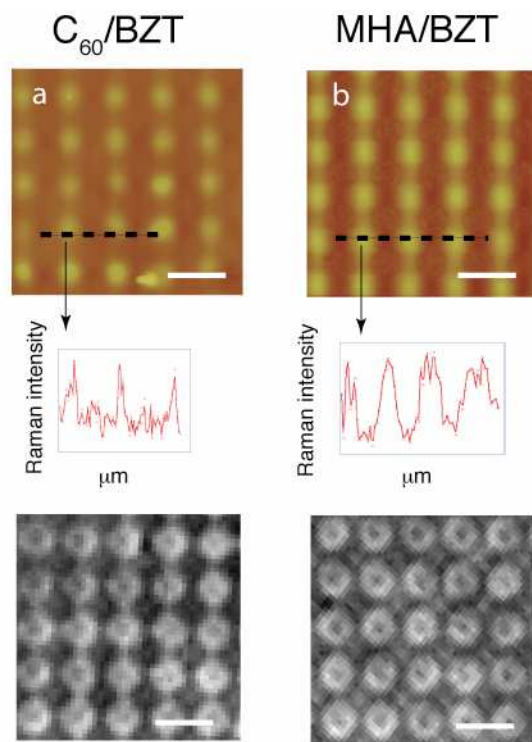

**Figure S14** Comparison of AFM topography (top row), Raman line scans (middle row) of peak intensity (cps) at  $1460\text{ cm}^{-1}$  across regions indicated by the black dashed lines in the AFM images, and fluorescence images (bottom row) resulting from excitation at  $\lambda = 632\text{ nm}$  (exposure time = 0.2 sec) for F8BT:PPV/PCBM films prepared and annealed in the usual way on (a)  $C_{60}/BZT$  and (b)  $MHA/BZT$ . The black arrows indicate the center of a dot in the AFM image and the corresponding position in the Raman line scan; lateral scales of all images are equivalent, with scale bars =  $5\text{ }\mu m$ . Vertical scale =  $200\text{ nm}$  for both samples.

**Table S1** Summary of behaviors observed for PPV:PCBM films.

| <b>PPV:PCBM films</b>  | Patterning visible by Bright Field | Net Aggregation of Material (AFM) | Brighter PCBM Fluorescence | Higher PCBM Raman Signal Intensity |
|------------------------|------------------------------------|-----------------------------------|----------------------------|------------------------------------|
| C <sub>60</sub> /MUAm  | Yes                                | P <sup>a</sup>                    | B                          |                                    |
| C <sub>60</sub> /HSPyr | Yes                                | B <sup>b</sup>                    | P                          | P                                  |
| C <sub>60</sub> /BZT   | Yes                                | B                                 | B and P                    | B                                  |
| C <sub>60</sub> /MUO   | Yes                                | P                                 | P                          | B                                  |
| C <sub>60</sub> /MHA   | Yes                                | P                                 | B and P                    | P                                  |
| MHA/MUAm               | Yes                                | P                                 | B                          | B                                  |
| MHA/HSPyr              | Yes                                | B                                 | P                          | B                                  |
| MHA/BZT                | Yes                                | B and P <sup>c</sup>              | P                          | P                                  |
| MHA/MUO                | Yes                                | B                                 | B and P                    |                                    |

Pattern/backfill combinations were prepared as depicted in Figure 2 of the text; films were prepared and annealed as described in the Experimental Section. Fields left blank are for those cases where the results were ambiguous. <sup>a</sup>Patterned regions of the film; <sup>b</sup>Unpatterned regions of the film; <sup>c</sup>Both patterned and unpatterned regions show aggregation of material (or increased PCBM fluorescence), with clear influence from the surface patterning.



**Table S2** Summary of behaviors observed for P3HT:PCBM films.

| <b>P3HT:PCBM films</b> | Patterning visible by Bright Field | Net Aggregation of Material (AFM) | Brighter PCBM Fluorescence                                                                                                              | Higher PCBM Raman Signal Intensity | Formation of large PCBM crystallites |
|------------------------|------------------------------------|-----------------------------------|-----------------------------------------------------------------------------------------------------------------------------------------|------------------------------------|--------------------------------------|
| C <sub>60</sub> /MUAm  | Yes                                |                                   | Unable to run fluorescence and Raman experiments on P3HT:PCBM samples due to interference from P3HT in the spectral regions of interest |                                    | N                                    |
| C <sub>60</sub> /HSPyr | Yes                                | P                                 |                                                                                                                                         |                                    | Y (P)                                |
| C <sub>60</sub> /BZT   | Yes                                | B                                 |                                                                                                                                         |                                    | Y (B)                                |
| C <sub>60</sub> /MUO   | Yes                                | B (slight)                        |                                                                                                                                         |                                    | N                                    |
| C <sub>60</sub> /MHA   | No                                 |                                   |                                                                                                                                         |                                    | N                                    |
| MHA/MUAm               | No                                 |                                   |                                                                                                                                         |                                    | N                                    |
| MHA/HSPyr              | Yes                                | P                                 |                                                                                                                                         |                                    | Y (P)                                |
| MHA/BZT                | Yes                                | B                                 |                                                                                                                                         |                                    | Y (B)                                |
| MHA/MUO                | Yes                                | B                                 |                                                                                                                                         |                                    | Y (B)                                |

Pattern/backfill combinations were prepared as depicted in Figure 2 of the text; films were prepared and annealed as described in the Experimental Section. Fields left blank are for those cases where the results were ambiguous.

**Table S3** Summary of behaviors observed for F8BT:PCBM films.

| <b>F8BT:PCBM films</b> | Patterning visible by Bright Field | Net Aggregation of Material (AFM) | Brighter PCBM Fluorescence | Higher PCBM Raman Signal Intensity |
|------------------------|------------------------------------|-----------------------------------|----------------------------|------------------------------------|
| C <sub>60</sub> /MUAm  | Y                                  | P (slight)                        |                            | B (slight)                         |
| C <sub>60</sub> /HSPyr | Y                                  |                                   |                            | B                                  |
| C <sub>60</sub> /BZT   | Y                                  | P                                 | P                          | P                                  |
| C <sub>60</sub> /MUO   | Y                                  |                                   |                            |                                    |
| C <sub>60</sub> /MHA   | Y                                  | P (slight)                        |                            |                                    |
| MHA/MUAm               | Y                                  | P (slight)                        |                            |                                    |
| MHA/HSPyr              | Y                                  |                                   | P                          |                                    |
| MHA/BZT                | Y                                  | P                                 | P                          | B                                  |
| MHA/MUO                | Y                                  |                                   |                            |                                    |

Pattern/backfill combinations were prepared as depicted in Figure 2 of the text; films were prepared and annealed as described in the Experimental Section. Fields left blank are for those cases where the results were ambiguous.

**Table S4** Summary of behaviors observed for PFB:PCBM films.

| <b>PFB:PCBM films</b>  | Patterning visible by Bright Field | Net Aggregation of Material (AFM) | Brighter PCBM Fluorescence | Higher PCBM Raman Signal Intensity |
|------------------------|------------------------------------|-----------------------------------|----------------------------|------------------------------------|
| C <sub>60</sub> /MUAm  | Y                                  | P                                 |                            |                                    |
| C <sub>60</sub> /HSPyr | Y                                  |                                   |                            |                                    |
| C <sub>60</sub> /BZT   | Y                                  | B                                 |                            |                                    |
| C <sub>60</sub> /MUO   | N                                  |                                   |                            |                                    |
| C <sub>60</sub> /MHA   | N                                  |                                   |                            |                                    |
| MHA/MUAm               | Y                                  | P (slight)                        |                            |                                    |
| MHA/HSPyr              | Y, faint                           |                                   |                            |                                    |
| MHA/BZT                | Y                                  | P (slight)                        |                            |                                    |
| MHA/MUO                | Y, faint                           | P (slight)                        |                            |                                    |

Pattern/backfill combinations were prepared as depicted in Figure 2 of the text; films were prepared and annealed as described in the Experimental Section. Fields left blank are for those cases where the results were ambiguous.

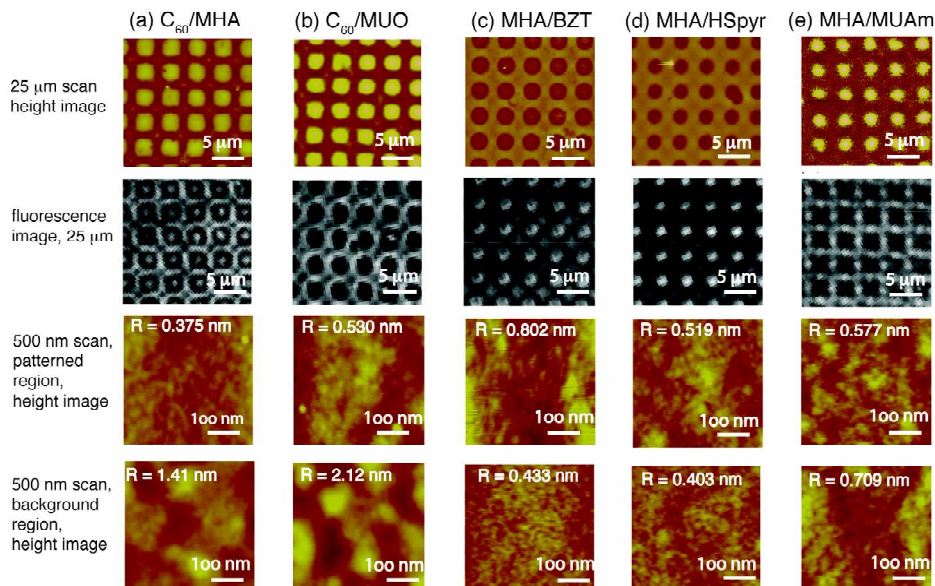

**Figure S15** Row 1: Large area height images (intermittent mode) of MDMO-PPV:PCBM films on a variety of surface chemistries (the same as those in Figure 6). Vertical scale for (a), (b), (e) in Row 1 = 200 nm; vertical scale for (c) and (d) = 100 nm. Row 2: Fluorescence images for the same samples (as shown in Figure 6). Row 3: Height images (intermittent mode) of  $(500 \text{ nm})^2$  areas of the patterned regions (circles) of the samples in Row 1. Vertical scale for all images in Row 3 = 10 nm. Row 4: Height images (intermittent mode) of  $(500 \text{ nm})^2$  areas of the background regions of the samples in Row 1. Vertical scale for (a) and (b) in Row 4 = 25 nm; vertical scale for (c)-(e) = 10 nm. Values for surface roughness are shown for all the images in Rows 3 and 4.
